# Supplementary material
Source: Springer Nature journal article supplement (https://www.springermedizin.de/resource/supplementary/13054_2010_8503_MOESM7_ESM.pdf/9732124)

**(a)**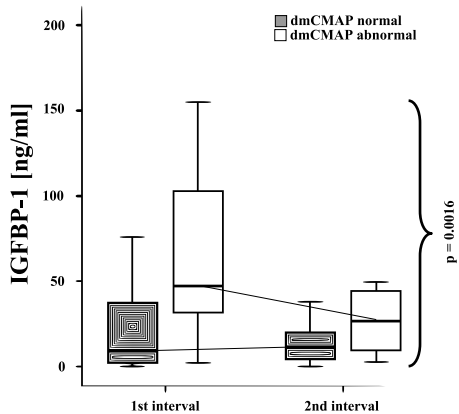**(b)**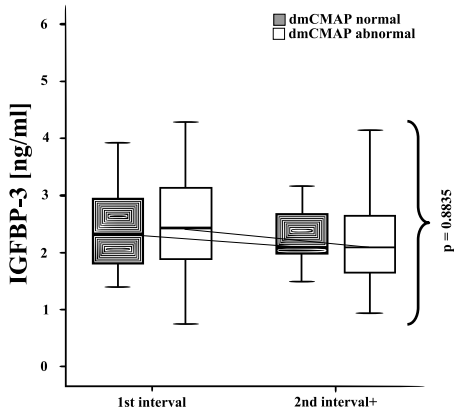

Supplement: MOESM7 [file 9732124]
